# Supplementary material
Source: publisher site journal article supplement (https://www.degruyterbrill.com/publication/isbn/9783110340556/downloadAsset/9783110340556_Contents.pdf)
Supplement: Supplementary file 1 [file 9783110340556_Contents.pdf]

# Contents

Acknowledgments — IX

List of Abbreviations — XI

## Introduction

### Why W.G. Sebald — 1

The Borders of World Literature: Sebald the Author and the Phenomenon — 3

International and Transdisciplinary Reception — 14

Scope and Method — 19

## Chapter 1

### Literature as Historiography in Context — 33

Literature versus Historiography across the Ages — 34

Toward a Genealogy of a Present Past — 45

Literary Historiography: A Method of Interdiscursive Writing — 47

The Building Blocks of a Hybrid Form: Genre, Narration, Structure — 60

Overcoming the Obstacles in Representing the Past — 66

## Chapter 2

### Conscious Historiography and the Writer's Conscience — 69

Writing on the Border between Literary Studies and Literature — 69

Literary Portraits as Self-Portrait: *Logis in einem Landhaus* — 72

From Polemic to Poetics: *Luftkrieg und Literatur* — 82

The Author's Role and the Reader's Engagement — 95

## Chapter 3

### What is (in) an Image? Mimesis, Representability, and Visual History — 100

Art and Reality — 100

Representing the Holocaust and Photographs of Auschwitz — 112

Untangling Fact from Fiction: Sebald's Extratextual Materials — 120

Literature as Historiography and Visual History — 143

Coda — 148

## Chapter 4

### Chronology and Coincidence in the Narrative Cosmos — 150

Outlining the Narrative Frame: From Flow to Tableau — 150

- Plotting the Text: Simultaneity and Co-Presence of Past,  
Present, and Future — 155
- Drawing Parallels: Narrative Dis/Conjuncture and  
Intratextual Cross-References — 163
- Revealing Changes: Additions and Subtractions in the  
*Austerlitz* Manuscript — 170
- Uncovering the Past: Restitution through Literary Archaeology — 176

## **Chapter 5**

### **Witness and Testimony in Literary Memory — 182**

- Post-Postmemory: Discourses, Concepts, and Modes of Memory — 185
- Testimonial Structure: Making Sense of the Past by Making  
Meaning in the Present — 189
- Memory's Attributes: Visuality, Physicality, Materiality, Uncertainty — 194
- Memory's Opposites: Repression and the Crisis of Language — 209

## **Chapter 6**

### **Translation as Metaphor and Conservative Innovation — 216**

- Textual Translation — 217
- Intermedial, Intratextual, and Intertextual Translation — 226
- Metaphorical Translation — 236
- Irony of/and Literary Innovation — 238
- Translation as Context — 244

## **Conclusion**

### **Panoramic Outlook — 246**

### **Bibliography of W.G. Sebald's Primary Works and of Works Cited — 250**

- I. Primary Sources — 250
- II. Primary Texts of W.G. Sebald — 251
  - A. Fictional Prose and Poetry — 251
  - B. English Translations of Sebald's Works — 252
  - C. Works in Translation (cited in this book) — 252
  - D. Literary Criticism, Essays, Biographies, Translations — 252
- III. Secondary Literature on W.G. Sebald (cited in this book) — 257
- IV. W.G. Sebald-Related/-Inspired Films and Websites — 269
- V. Related Primary and Secondary Literature — 269

### **Name Index — 279**

### **Subject Index — 286**
